# Supplementary material for: A DIO2 missense mutation and its impact on fetal response to PRRSV infection
Source: PubMed Central journal article supplement (PMC11167750; doi:10.1186/s12917-024-04099-4), 2024-06-12
Supplement: 12917_2024_4099_MOESM1_ESM.pdf [file 12917_2024_4099_MOESM1_ESM.pdf]

**Supplementary table 1.** Single nucleotide polymorphisms (SNPs) identified in pig *DIO2* exons for trial-2 parents.

| position  | strand | dbSNP ID    | SNP label <sup>†</sup> | Sequence change <sup>¶</sup> | R <sup>2</sup> .with.DRGA SNP <sup>#</sup> | P value.LD <sup>#</sup> | pCADD  |
|-----------|--------|-------------|------------------------|------------------------------|--------------------------------------------|-------------------------|--------|
| 103096648 | -      | rs338965211 | SNP24                  | c.*4855G>T                   | 0.045                                      | 0.086                   | 0.053  |
| 103096741 | -      | rs80940301  | SNP23                  | c.*4762C>T                   | 0.045                                      | 0.086                   | 0.504  |
| 103096948 | -      | rs331231927 | SNP22                  | c.*4555C>T                   | 0.045                                      | 0.086                   | 9.568  |
| 103096967 | -      | rs341304760 | SNP21                  | c.*4536G>A                   | 0.832                                      | 0.000                   | 0.550  |
| 103096995 | -      | rs323408162 | SNP20                  | c.*4508T>C                   | 0.045                                      | 0.086                   | 2.338  |
| 103097282 | -      | rs324131721 | SNP19                  | c.*4221C>T                   | 0.231                                      | 0.000                   | 0.057  |
| 103099552 | -      | rs345026587 | SNP18                  | c.*1951C>G                   | 0.409                                      | 0.000                   | 0.026  |
| 103099651 | -      | rs324198118 | SNP17                  | c.*1852C>T                   | 0.409                                      | 0.000                   | 3.137  |
| 103100111 | -      | rs339409577 | SNP16                  | c.*1392G>T                   | 0.033                                      | 0.140                   | 0.026  |
| 103100152 | -      | rs324953755 | SNP15                  | c.*1351C>T                   | 0.885                                      | 0.000                   | 0.095  |
| 103100321 | -      | rs326165011 | SNP14                  | c.*1182A>G                   | 0.045                                      | 0.086                   | 3.897  |
| 103100332 | -      | rs345554161 | SNP13                  | c.*1171T>G                   | 0.326                                      | 0.000                   | 5.388  |
| 103100356 | -      | rs336144847 | SNP12                  | c.*1147T>C                   | 0.209                                      | 0.000                   | 1.502  |
| 103100401 | -      | rs318454513 | SNP11                  | c.*1102G>C                   | 0.209                                      | 0.000                   | 0.615  |
| 103100459 | -      | rs327964482 | SNP10                  | c.*1044A>G                   | 0.326                                      | 0.000                   | 0.140  |
| 103100689 | -      | rs319212422 | SNP9                   | c.*814C>T                    | 0.209                                      | 0.000                   | 0.115  |
| 103100692 | -      | rs328655817 | SNP8                   | c.*811G>A                    | 0.209                                      | 0.000                   | 2.663  |
| 103100763 | -      | rs345068596 | SNP7                   | c.*740A>G                    | 0.209                                      | 0.000                   | 4.295  |
| 103100787 | -      | rs320872938 | SNP6                   | c.*716T>G                    | 0.209                                      | 0.000                   | 0.035  |
| 103101248 | -      | rs338724710 | SNP5                   | c.*255T>C                    | 0.301                                      | 0.000                   | 10.244 |
| 103101389 | -      | rs324974389 | SNP4                   | c.*114G>C                    | 0.21                                       | 0.000                   | 0.775  |
| 103101455 | -      | rs340742293 | SNP3                   | c.*48G>A                     | 0.016                                      | 0.304                   | 0.288  |
| 103102040 | -      | rs323844025 | SNP2                   | c.273T>C                     | 0.045                                      | 0.086                   | 0.442  |
| 103102041 | -      | rs333347361 | SNP1                   | c.272A>G                     | 0.045                                      | 0.086                   | 0.001  |

Parental DNA samples (N=33, 27 gilts, 6 sires) from trial-2 [1] were used to detect SNPs.

<sup>†</sup>SNP label is the same as the labels of SNP in the heatmap of genotypes and haplotypes across *DIO2* SNPs as shown in Figure 1B and 1C.

<sup>†</sup>Sequence change follows sequence variant nomenclature by Human Genome Variation Society (HGVS): e.g., c\*4855G>T denotes a substitution of the G nucleotide by a T at base position 4855 from the 3' of the translation stop codon in the coding DNA (cDNA) reference sequence. c.272A>G denotes a substitution of the A nucleotide by a G at base position 272 from A of the ATG-translation initiation codon in the cDNA sequence.

\*R<sup>2</sup>.with.DRGA SNP, Linkage disequilibrium (LD) estimate using squared allelic correlation coefficient (R<sup>2</sup>) between DRGA0008048 and each SNP detected.

#P value.LD, significance of LD estimate.

**Supplementary table 2.** Known or proposed causative variants in pigs annotated by pCADD scores.

| Gene (variant)         | Chromosomal locus | Variant effect        | dbSNP ID     | Trait affected                                                | pCADD score | Reference |
|------------------------|-------------------|-----------------------|--------------|---------------------------------------------------------------|-------------|-----------|
| MC4R (p.Asp298Asn)     | 1:160,773,437     | Missense variant      | rs81219178   | Growth and fatness                                            | 27.477      | [2]       |
| NR6A1 (p.Leu192Pro)    | 1:265347265       | Missense variant      | rs326780270  | Vertebrae number                                              | 17.198      | [3]       |
| IGF2 (g.1483817T>C)    | 2:1,483,817       | Intronic variant      |              | Muscle growth                                                 | 15.609      | [4]       |
| PHKG1 (g.16830320C>A)  | 3:16,830,320      | Splice region variant | rs330928088  | Glycogen content and meat quality                             | 2.130       | [5]       |
| POLR1B (g.43952776T>G) | 3:43952776        | splice region variant |              | Lethal recessives                                             | 10.144      | [6]       |
| RYR1 (p.Arg651Cys)     | 6:47,357,966      | Missense variant      | rs344435545  | Malignant hypothermia                                         | 0.139       | [7, 8]    |
| LEPR (p.Leu663Phe)     | 6:146829589       | Missense variant      | rs709596309  | Productive, fatness and meat quality                          | 22.868      | [9]       |
| PNKP (p.Gln96Arg)      | 6:54880241        | Missense variant      |              | Lethal recessives                                             | 28.767      | [6]       |
| VRTN (g.97614602A>C)   | 7:97,614,602      | Noncoding variant     | rs709317845  | Vertebrae number                                              | 11.952      | [10]      |
| PPARD (p.Gly32Glu)     | 7:31281804        | Missense variant      | rs80909573   | Ear size, fat metabolism, skin and cartilage development      | 21.589      | [11]      |
| SYNGR2 (p.Cys63Arg)    | 12:3,797,515      | Missense variant      | rs3473454700 | Porcine circovirus viral load                                 | 0.00013     | [12]      |
| TADA2A (g.38922102G>A) | 12:38922102       | splice donor variant  |              | Lethal recessives                                             | 21.848      | [6]       |
| MSTN (p.Glu274*)       | 15:94,623,834     | Stop gain variant     |              | Leg weakness                                                  | 38.959      | [13]      |
| PRKAG3 (p.Arg250Gln)   | 15:120,863,533    | Missense variant      | rs1109104772 | Glycogen content and meat quality                             | 32.657      | [14]      |
| PCK1 (p.Met139Leu)     | 17:57932233       | Missense variant      | rs343196765  | Intramuscular fat content, backfat thickness and meat quality | 23.322      | [15]      |

This table was based on published tables for known or proposed causal variants in pigs [16, 17].

**Supplementary table 3.** Comparison of fetal phenotypes grouped by level of log fold change in *DIO2* expression in fetal heart.

| Fetal genotype and phenotype <sup>†</sup> | Group by log FC of <i>DIO2</i> |                        |                   |
|-------------------------------------------|--------------------------------|------------------------|-------------------|
|                                           | High <sup>†</sup> (n=5)        | Mid <sup>†</sup> (n=9) | Mid (n=2)         |
| Asn91Ser genotype                         | CD                             | CC                     | CD                |
| logddDIO2                                 | 1.7 (0.4)                      | -0.2 (0.3)             | 0 (0.7)           |
| Brain to liver weight                     | 1.4 (0.1)                      | 1.3 (0.1)              | 1.3 (0.1)         |
| <b>Viral load in placenta</b>             | <b>5.3 (0.6)</b>               | <b>3.7 (1.3)</b>       | <b>1.7 (1.7)</b>  |
| <b>Viral load in serum</b>                | <b>7.6 (0.6)</b>               | <b>4.1 (2.6)</b>       | <b>1.7 (0.6)</b>  |
| <b>Viral load in thymus</b>               | <b>6.8 (0.3)</b>               | <b>3.5 (2)</b>         | <b>1.6 (0.7)</b>  |
| <b>T4 (nmol/L)</b>                        | <b>54.6 (15.5)</b>             | <b>70.9 (21.9)</b>     | <b>75.6 (4.1)</b> |
| T3 (nmol/L)                               | 0.6 (0.1)                      | 0.6 (0.2)              | 0.6 (0.1)         |
| litter size                               | 17.6 (3.3)                     | 17.3 (2.3)             | 20 (0)            |
| Fetal weight (g)                          | 930.6 (87.6)                   | 876.6 (126.1)          | 932 (39.4)        |
| Crown rump length (cm)                    | 36.9 (1.2)                     | 35.6 (1.7)             | 37.1 (0.1)        |
| Girth (cm)                                | 8.6 (0.4)                      | 8.4 (0.5)              | 8.7 (0)           |
| Brain weight (g)                          | 28.7 (1.3)                     | 25.9 (2.4)             | 29.4 (1.8)        |
| Liver weight (g)                          | 21.2 (2.1)                     | 20.2 (1.9)             | 22.2 (0.8)        |
| Heart weight (g)                          | 6.8 (0.6)                      | 7.1 (1.2)              | 7.8 (0.2)         |
| Lung weight (g)                           | 25.4 (3.2)                     | 26.4 (4.9)             | 28.9 (0.2)        |
| Thyroid weight (mg)                       | 213 (41.9)                     | 204.9 (55.2)           | 243.5 (38.9)      |
| Adrenal weight (mg)                       | 216.8 (49.4)                   | 146.7 (46.4)           | 146.5 (53)        |
| Spleen weight (g)                         | 1.5 (0.2)                      | 1.3 (0.3)              | 1.4 (0.3)         |

<sup>†</sup>Fetal phenotypes were represented by mean (SD); phenotypes were bolded if high group showed a deviation from mid groups.

<sup>†</sup>5 CD fetuses with log fold change (FC) of *DIO2* >1 (High) were compared with 9 CC or 2 CD fetuses with  $-0.5 \leq \log \text{FC} \leq 0.5$  (Mid), while being at the same range of the covariate ( $1.1 \leq \text{brain to liver weight} \leq 1.46$ ).

**Supplementary table 4.** Estimated marginal mean (SE or 95% CI) associating Asn91ser genotypes (CC, CD) with fetal outcomes.

| Fetal outcomes                       | Estimated marginal mean (SE or 95% CI) |                     |                |                     |                     |                | Other predictors included              |
|--------------------------------------|----------------------------------------|---------------------|----------------|---------------------|---------------------|----------------|----------------------------------------|
|                                      | Trial-1                                |                     |                | Trial-2             |                     |                |                                        |
|                                      | CC                                     | CD                  | <i>P</i> value | CC                  | CD                  | <i>P</i> value |                                        |
| Fetal viability <sup>†</sup>         | 0.66<br>(0.41-0.84)                    | 0.57<br>(0.32-0.78) | 0.54           | 0.41<br>(0.22-0.63) | 0.75<br>(0.54-0.88) | 0.18           | sex                                    |
| Fetal survival <sup>‡</sup>          | 0.64<br>(0.39-0.83)                    | 0.73<br>(0.48-0.88) | 0.33           | 0.73<br>(0.55-0.86) | 0.81<br>(0.65-0.90) | 0.33           | sex                                    |
| <b>Viral loads</b>                   |                                        |                     |                |                     |                     |                |                                        |
| Serum viral loads (log10 copies/ul)  | 2.18 (1.36)                            | 1.58 (1.37)         | 0.21           | 5.75 (0.93)         | 5.16 (0.93)         | 0.21           | fetal preservation, T4 level           |
| Thymic viral loads (log10 copies/mg) | 2.48 (1.45)                            | 1.78 (1.46)         | 0.15           | 4.43 (1.00)         | 3.73 (0.99)         | 0.15           | fetal preservation, T4 level           |
| <b>Thyroid hormone levels</b>        |                                        |                     |                |                     |                     |                |                                        |
| T4 in serum (nmol/L)                 | 25.23 (2.70)                           | 21.47 (2.86)        | 0.16           | 77.11 (2.14)        | 73.35 (2.09)        | 0.16           | fetal classification, litter size, sex |
| T3 in serum (nmol/L)                 | 0.59 (0.08)                            | 0.61 (0.08)         | 0.64           | 0.75 (0.06)         | 0.77 (0.06)         | 0.64           | fetal classification, body weight      |
| <b>Morphometrics</b>                 |                                        |                     |                |                     |                     |                |                                        |
| Body weight (g) <sup>¶</sup>         | 816.17 (43.60)                         | 900.73 (44.87)      | 0.13           | 996.39 (39.11)      | 875.89 (38.75)      | 0.13           | fetal classification, litter size      |
| Crown rump length (cm) <sup>¶</sup>  | 26.68 (0.60)                           | 28.15 (0.62)        | 0.009          | 37.03 (0.56)        | 35.11 (0.56)        | 0.031          | fetal classification, litter size      |
| <b>Organ weights</b>                 |                                        |                     |                |                     |                     |                |                                        |
| Brain (g)                            | 24.15 (0.60)                           | 24.13 (0.61)        | 0.98           | 26.87 (0.46)        | 26.86 (0.46)        | 0.98           | fetal classification                   |
| Ratio: brain to liver weight         | 1.08 (0.09)                            | 1.08 (0.09)         | 0.9            | 1.11 (0.07)         | 1.10 (0.07)         | 0.9            | fetal classification, litter size      |

<sup>†</sup>Estimated probability (95% CI) indicated for interaction effect between Asn91Ser and trial, with *P* value adjusted by Benjamini-Hochberg (BH) method across all possible pairwise comparisons.

<sup>‡</sup>Estimated probability (95% CI)

<sup>¶</sup>Estimated marginal mean (SE) indicated for interaction effect between Asn91Ser and trial, with *P* value adjusted by Benjamini-Hochberg (BH) method across all possible pairwise comparisons.

**Supplementary table 5.** Determination of sequence variants in pig *TSHR* region for trial-2 sires (N=6).

| position  | strand | dbSNP ID     | SNP label             | sequence change                  | R <sup>2</sup> .with.Asn91Ser <sup>†</sup> | P.value.LD <sup>‡</sup> |
|-----------|--------|--------------|-----------------------|----------------------------------|--------------------------------------------|-------------------------|
| 103768370 | +      | no dbSNP     | 5_prime_UTR_variant1  | c.-619T>C                        | 0.06642523                                 | 0.37196101              |
| 103768497 | +      | no dbSNP     | 5_prime_UTR_variant2  | c.-492C>T                        | 0.06642523                                 | 0.37196101              |
| 103768500 | +      | no dbSNP     | 5_prime_UTR_variant3  | c.-489T>C                        | 0.46621872                                 | 0.018015671             |
| 103768553 | +      | no dbSNP     | 5_prime_UTR_variant4  | c.-436C>T                        | 0.06642523                                 | 0.37196101              |
| 103768590 | +      | no dbSNP     | 5_prime_UTR_variant5  | c.-399T>C                        | 0.46621872                                 | 0.018015671             |
| 103768716 | +      | no dbSNP     | 5_prime_UTR_variant6  | c.-273T>C                        | 0.46621872                                 | 0.018015671             |
| 103768817 | +      | no dbSNP     | 5_prime_UTR_variant7  | c.-172A>C                        | 0.199701409                                | 0.206242057             |
| 103768826 | +      | no dbSNP     | 5_prime_UTR_variant8  | c.-163G>A                        | 0.110862332                                | 0.346319129             |
| 103768890 | +      | no dbSNP     | 5_prime_UTR_variant9  | c.-99T>G                         | 0.199701409                                | 0.206242057             |
| 103768892 | +      | no dbSNP     | 5_prime_UTR_variant10 | c.-97_-96insCGAGT                | NA <sup>¶</sup>                            | NA                      |
| 103768930 | +      | no dbSNP     | 5_prime_UTR_variant11 | c.-59A>G                         | 0.237775307                                | 0.09118638              |
| 103847623 | +      | rs1112876687 | intron_variant1       | c.171-145G>C                     | 0.46621872                                 | 0.018015671             |
| 103847991 | +      | rs1111127688 | intron_variant2       | c.242+152C>T                     | 0.46621872                                 | 0.018015671             |
| 103853698 | +      | rs1107841267 | intron_variant3       | c.317+113_317+114insCT           | NA                                         | NA                      |
| 103867986 | +      | rs1108767362 | intron_variant4       | c.318-122G>A                     | 0.666106717                                | 0.004695127             |
| 103868013 | +      | rs1109465473 | intron_variant5       | c.318-95A>G                      | 0.666106717                                | 0.004695127             |
| 103868217 | +      | No dbSNP     | intron_variant6       | c.392+35_392+40insB <sup>#</sup> | 0.666106717                                | 0.004695127             |
| 103874397 | +      | rs792895037  | intron_variant7       | c.468-9C>T                       | 0.030134093                                | 0.54761393              |
| 103874498 | +      | rs1107939652 | intron_variant8       | c.545+15T>C                      | 0.110862332                                | 0.248743321             |
| 103877467 | +      | rs1112574587 | intron_variant9       | c.546-505A>G                     | 0.46621872                                 | 0.018015671             |
| 103877514 | +      | No dbSNP     | intron_variant10      | c.546-458A>G                     | 0.46621872                                 | 0.018015671             |
| 103877580 | +      | No dbSNP     | intron_variant11      | c.546-392C>A                     | 0.46621872                                 | 0.018015671             |

|           |   |              |                      |              |            |             |
|-----------|---|--------------|----------------------|--------------|------------|-------------|
| 103877650 | + | rs1110746575 | intron_variant12     | c.546-322G>A | 0.46621872 | 0.018015671 |
| 103877694 | + | rs1112391719 | intron_variant13     | c.546-278T>C | 0.46621872 | 0.018015671 |
| 103877788 | + | rs1113090843 | intron_variant14     | c.546-184A>C | 0.46621872 | 0.018015671 |
| 103877791 | + | rs1110448239 | intron_variant15     | c.546-181G>T | 0.46621872 | 0.018015671 |
| 103877804 | + | rs1111217740 | intron_variant16     | c.546-168T>C | 0.46621872 | 0.018015671 |
| 103877955 | + | rs1110230512 | intron_variant17     | c.546-17A>T  | 0.46621872 | 0.018015671 |
| 103889483 | + | rs1109842851 | intron_variant18     | c.615-178A>C | 0.46621872 | 0.018015671 |
| 103923199 | + | rs699096214  | missense_variant     | c.1618A>G    | NA         | NA          |
| 103922622 | + | rs196952307  | synonymous_variant1  | p.His347=    | 0.46621872 | 0.018015671 |
| 103922631 | + | rs196957158  | synonymous_variant2  | p.Ser350=    | 0.46621872 | 0.018015671 |
| 103924033 | + | rs1111686982 | 3_prime_UTR_variant1 | c.*157G>A    | 0.46621872 | 0.018015671 |

<sup>†</sup>R<sup>2</sup>.with.Asn91Ser: Linkage disequilibrium (LD) estimate using squared allelic correlation coefficient (R<sup>2</sup>) between the coding variant (p.Asn91Ser) in *DIO2* and each SNP detected.

<sup>†</sup>NA, LD not estimated since all sires had the same genotype, just differing compared to reference sequence.

<sup>‡</sup>P value.LD, significance of LD estimate

<sup>#</sup>B allele denotes inserted alleles collectively compared to reference sequence at SSC7:1038682

**Supplementary table 6.** Primers used for Sanger sequencing.

| Gene name<br>(Ensembl Gene stable ID <sup>†</sup> ) | Amplicons   | Forward primer (5'→3')   | Reverse primer (5'→3')  | Amplicon<br>length (bp) | Overlap<br>with<br>previous<br>amplicon | Overlap<br>with next<br>amplicon |
|-----------------------------------------------------|-------------|--------------------------|-------------------------|-------------------------|-----------------------------------------|----------------------------------|
| DIO2 (ENSSSCG00000040638) <sup>‡</sup>              | amplicon_1  | GGCTGGAGAGACTGGACTTG     | AGATGGTTCTGCTGCCAACT    | 1108                    | -                                       | -                                |
|                                                     | amplicon_2A | CCATGATGGCTCTTTCCTCA     | GGGCTCTATCCATGCTGAAG    | 1177                    | -                                       | 244                              |
|                                                     | amplicon_2B | GCTCAAAGTAGCCCCATCA      | GCCTTACATCAAAGCCTCCA    | 1150                    | 244                                     | 443                              |
|                                                     | amplicon_2C | GAGAATGGCAGATGGAGAGG     | TGGAACAAAGGGGAAGTTTG    | 1295                    | 443                                     | 404                              |
|                                                     | amplicon_2D | TCAGTGTGCAAGAACCAAAG     | ATTCATGCCCATTCAGGAAA    | 1268                    | 404                                     | 355                              |
|                                                     | amplicon_2E | TTTCAATATCCACCCACCT      | GGGACAGAAGTTGGTGCCTA    | 1007                    | 355                                     | 276                              |
|                                                     | amplicon_2F | CTGCCTTGCTGCATAAAACA     | AGAGCTGCTGCCCAAGATAG    | 944                     | 276                                     | 351                              |
|                                                     | amplicon_2G | GAACAGGACCTGGGAGATCA     | CCAGGGGCAAGTTCTAGAGAG   | 1112                    | 351                                     | -                                |
| TSHR (ENSSSCG00000031771) <sup>§</sup>              | amplicon_1  | GGCAGACCAGAATTTACCAGTTG  | GGCCTCTTCTCAAGCTCTTTTTG | 1124                    | -                                       | -                                |
|                                                     | amplicon_2  | CATCCCAGTCTACTGCTACTTCAG | ACCCGTCGTGAAAAGAGAATCAA | 701                     | -                                       | -                                |
|                                                     | amplicon_3  | AGGACTAATGTAGTGGAGGAACT  | GCTGACACGGTAGTACAGAAAG  | 813                     | -                                       | -                                |
|                                                     | amplicon_4  | AATCCACTCAAACCTCCACTC    | AGTTCCCATCGTGGTTCAATAG  | 764                     | -                                       | -                                |
|                                                     | amplicon_5  | CCATGGTCTCTCAGGTAATTAAGG | TTCTTTCTTGAGCCCACTCC    | 505                     | -                                       | -                                |
|                                                     | amplicon_6  | TGAAATCCATTGGTCCCATTCT   | GACTTTGGGACGGTCACTTAAA  | 963                     | -                                       | -                                |
|                                                     | amplicon_7  | CCATGGTCTGTCTGCTTTCT     | GGTCGTAATACTCTGGTGTG    | 759                     | -                                       | -                                |
|                                                     | amplicon_8  | TGCCATTGGCCAGGTAAG       | CCAATAATCACACTCCTCCTTT  | 748                     | -                                       | -                                |
|                                                     | amplicon_9  | ACAGGAGTGGGAGCAATTTAG    | GCAAGATCTGGTCATCTCCTAAA | 856                     | -                                       | -                                |
|                                                     | amplicon_10 | CTTGAATTGCTTGCAGATGAGAA  | GTCTTTGTCTCCCGGGTTATAC  | 1198                    | -                                       | 418                              |
|                                                     | amplicon_11 | GTACTACAACCATGCCATCGAC   | GCCATTGTTGCATTTAGCATCT  | 1100                    | 418                                     | -                                |

<sup>†</sup>Ensembl gene ID for Pig genes (Sscrofa11.1) (Ensembl Release 105 (Dec 2021) used).

<sup>‡</sup>For *DIO2*, the first coding exon (ENSSSCE00000310588; 275 bp length;) was covered by 1 amplicon (amplicon\_1) and the second coding exon (ENSSSCE00000324921; 5666 bp length) covered by 7 amplicons (amplicon 2A to 2G).

<sup>§</sup>For *TSHR*, a predicted transcript isoform, TSHR-202 (ENSSSCT00000038969.2), was targeted for sequencing. Region of 1<sup>st</sup> (ENSSSCE00000332089) to 2<sup>nd</sup> (ENSSSCE00000288966) exon including 1<sup>st</sup> intron (863 bp length) covered by amplicon\_1; translated region (1414 bp length) of 11<sup>th</sup> exon (ENSSSCE00000324742) covered by 2



amplicons, amplicon\_10 and 11. The rest of exons (3<sup>rd</sup> to 10<sup>th</sup> exon) covered by each amplicon (amplicon\_2 to amplicon\_9).

Annealing temperature for all amplicons was 60°C.

**Supplementary table 7.** Primers used for quantitative real-time PCR.

| Gene name<br>(Ensembl Gene stable ID <sup>†</sup> ) | Forward primer (5'→3') | Reverse primer (5'→3') | Annealing<br>temp (°C) | Amplicon length<br>(bp) |
|-----------------------------------------------------|------------------------|------------------------|------------------------|-------------------------|
| DIO2 (ENSSSCG00000040638)                           | CTCGGTCATTCTCCTCAAGC   | TCACCTGTTTGTAGGCATCG   | 61                     | 140                     |
| ACTB (ENSSSCG00000007585)                           | CCAGCACGATGAAGATCAAG   | AGTCCGCCTAGAAGCATTTG   | 60                     | 171                     |
| HMBS (ENSSSCG00000015108)                           | AGGATGGGCAACTCTACCTG   | GATGGTGGCCTGCATAGTCT-  | 61                     | 83                      |
| SDHA (ENSSSCG00000020686)                           | CTACAAGGGGCAGGTTCTGA   | AAGACAACGAGGTCCAGGAG   | 61                     | 141                     |
| STX5 (ENSSSCG00000026293)                           | TGCAGAGTCGTCAGAATGGA   | CCAGGATTGTCAGCTTCTCC   | 60                     | 144                     |

<sup>†</sup>Ensembl gene ID for Pig genes (Sscrofa11.1) (Ensembl Release 105 (Dec 2021) used).

**Supplementary table 8.** Selected fetal population for association analysis.

| Genotyping method                                        | Trials               |                      |
|----------------------------------------------------------|----------------------|----------------------|
|                                                          | trial-1 <sup>†</sup> | trial-2 <sup>†</sup> |
| TaqMan assay                                             | 78                   | 59                   |
| inferred by parental genotypes<br>from Sanger sequencing | 0                    | 86                   |
| Total                                                    | 78                   | 145                  |

<sup>†</sup>trial-1, GWAS of Yang et al.(2016) [18]; trial-2, follow up study of Ko et al. (2022) [1].

## References

1. Ko H, Sammons J, Pasternak JA, Hamonic G, Starrak G, MacPhee DJ, Detmer SE, Plastow GS, Harding JCS. Phenotypic effect of a single nucleotide polymorphism on SSC7 on fetal outcomes in PRRSV-2 infected gilts. *Livestock Science*. 2022;255:104800.
2. Kim KS, Larsen N, Short T, Plastow G, Rothschild MF. A missense variant of the porcine melanocortin-4 receptor (MC4R) gene is associated with fatness, growth, and feed intake traits. *Mammalian Genome*. 2000;11(2):131-5.
3. Fontanesi L, Ribani A, Scotti E, Utzeri VJ, Veličković N, Dall'Olio S. Differentiation of meat from European wild boars and domestic pigs using polymorphisms in the MC1R and NR6A1 genes. *Meat Science*. 2014;98(4):781-4.
4. Van Laere A-S, Nguyen M, Braunschweig M, Nezer C, Collette C, Moreau L, Archibald AL, Haley CS, Buys N, Tally M, Andersson G, Georges M, Andersson L. A regulatory mutation in IGF2 causes a major QTL effect on muscle growth in the pig. *Nature*. 2003;425(6960):832-6.
5. Ma J, Yang J, Zhou L, Ren J, Liu X, Zhang H, Yang B, Zhang Z, Ma H, Xie X, Xing Y, Guo Y, Huang L. A splice mutation in the PHKG1 gene causes high glycogen content and low meat quality in pig skeletal muscle. *Plos Genetics*. 2014;10(10):e1004710.
6. Derks MFL, Gjuvslund AB, Bosse M, Lopes MS, Van Son M, Harlizius B, Tan BF, Hamland H, Grindflek E, Groenen MAM, Megens H-J. Loss of function mutations in essential genes cause embryonic lethality in pigs. *Plos Genetics*. 2019;15(3):e1008055.
7. Fujii J, Otsu K, Zorzato F, De Leon S, Khanna VK, Weiler JE, O'Brien PJ, MacLennan DH. Identification of a mutation in porcine ryanodine receptor associated with malignant hyperthermia. *Science*. 1991;253(5018):448-51.
8. Otsu K, Khanna VK, Archibald AL, MacLennan DH. Cosegregation of porcine malignant hyperthermia and a probable causal mutation in the skeletal muscle ryanodine receptor gene in backcross families. *Genomics*. 1991;11(3):744-50.
9. Óvilo C, Fernández A, Fernández AI, Folch JM, Varona L, Benítez R, Nuñez Y, Rodríguez C, Silió L. Hypothalamic expression of porcine leptin receptor (LEPR), neuropeptide Y (NPY), and cocaine- and amphetamine-regulated transcript (CART) genes is influenced by LEPR genotype. *Mammalian Genome*. 2010;21(11-12):583-91.
10. Fan Y, Xing Y, Zhang Z, Ai H, Ouyang Z, Ouyang J, Yang M, Li P, Chen Y, Gao J, Li L, Huang L, Ren J. A further look at porcine chromosome 7 reveals VRTN variants associated with vertebral number in Chinese and Western pigs. *PloS One*. 2013;8(4):e62534.
11. Ren J, Duan Y, Qiao R, Yao F, Zhang Z, Yang B, Guo Y, Xiao S, Wei R, Ouyang Z, Ding N, Ai H, Huang L. A missense mutation in PPARD causes a major QTL effect on ear size in pigs. *Plos Genetics*. 2011;7(5):e1002043.
12. Walker LR, Engle TB, Vu H, Tosky ER, Nonneman DJ, Smith TPL, Borza T, Burkey TE, Plastow GS, Kachman SD, Ciobanu DC. Synaptogyrin-2 influences replication of Porcine circovirus 2. *Plos Genetics*. 2018;14(10):e1007750.

13. Matika O, Robledo D, Pong-Wong R, Bishop SC, Riggio V, Finlayson H, Lowe NR, Hoste AE, Walling GA, Del-Pozo J, Archibald AL, Woolliams JA, Houston RD. Balancing selection at a premature stop mutation in the myostatin gene underlies a recessive leg weakness syndrome in pigs. *Plos Genetics*. 2019;15(1):e1007759.
14. Milan D, Jeon J-T, Looft C, Amarger V, Robic A, Thelander M, Rogel-Gaillard C, Paul S, Iannuccelli N, Rask L, Ronne H, Lundström K, Reinsch N, Gellin J, Kalm E, Roy Pascale L, Chardon P, Andersson L. A mutation in PRKAG3 associated with excess glycogen content in pig skeletal muscle. *Science*. 2000;288(5469):1248-51.
15. Latorre P, Burgos C, Hidalgo J, Varona L, Carrodeguas JA, López-Buesa P. c.A2456C-substitution in Pck1 changes the enzyme kinetic and functional properties modifying fat distribution in pigs. *Scientific Reports*. 2016;6(1):19617.
16. Groß C, Derks M, Megens H-J, Bosse M, Groenen MAM, Reinders M, De Ridder D. pCADD: SNV prioritisation in *Sus scrofa*. *Genetics Selection Evolution*. 2020;52(1):1-15.
17. Johnsson M, Jungnickel MK. Evidence for and localization of proposed causative variants in cattle and pig genomes. *Genetics Selection Evolution*. 2021;53(1):67.
18. Yang T, Wilkinson J, Wang Z, Ladinig A, Harding J, Plastow G. A genome-wide association study of fetal response to type 2 porcine reproductive and respiratory syndrome virus challenge. *Scientific Reports*. 2016;6(1):20305.
