# Supplementary material for: A DIO2 missense mutation and its impact on fetal response to PRRSV infection
Source: PubMed Central journal article supplement (PMC11167750; doi:10.1186/s12917-024-04099-4), 2024-06-12
Supplement: 12917_2024_4099_MOESM3_ESM.pdf [file 12917_2024_4099_MOESM3_ESM.pdf]

**PRRSV dysregulates fetal hypothalamic-pituitary-adrenal/thyroid axis independently of a missense mutation in the DIO2 gene. Ko *et al.***

**ARRIVE 10 guidelines 2.0**

|                                            |                                                                                                                                                                                                                                                            | Section/line number, or reason for not reporting                                                                    |                                                                                                                     |
|--------------------------------------------|------------------------------------------------------------------------------------------------------------------------------------------------------------------------------------------------------------------------------------------------------------|---------------------------------------------------------------------------------------------------------------------|---------------------------------------------------------------------------------------------------------------------|
|                                            |                                                                                                                                                                                                                                                            | Trial                                                                                                               |                                                                                                                     |
|                                            |                                                                                                                                                                                                                                                            | trial-1                                                                                                             | trial-2                                                                                                             |
| 1. Study design                            | a. The groups being compared, including control groups. If no control group has been used, the rationale should be stated.                                                                                                                                 | See gene expression analysis, phenotypic association analyses, cortisol assay analyses in the materials and methods | See gene expression analysis, phenotypic association analyses, cortisol assay analyses in the materials and methods |
|                                            | b. The experimental unit (e.g. a single animal, litter, or cage of animals).                                                                                                                                                                               | See PRRSV challenge experiments and collection of fetal phenotypes in the materials and methods                     | See PRRSV challenge experiments and collection of fetal phenotypes in the materials and methods                     |
| 2. Sample size                             | a. Specify the exact number of experimental units allocated to each group, and the total number in each experiment. Also indicate the total number of animals used.                                                                                        | See legends in figure 2-figure 5 and supplementary table 8 in additional file 1                                     | See legends in figure 2-figure 5 and supplementary table 8 in additional file 1                                     |
|                                            | b. Explain how the sample size was decided. Provide details of any a priori sample size calculation, if done.                                                                                                                                              | See fetal Asn91Ser genotyping in the materials and methods                                                          | See fetal Asn91Ser genotyping in the materials and methods                                                          |
| 3. Inclusion and exclusion criteria        | a. Describe any criteria used for including and excluding animals (or experimental units) during the experiment, and data points during the analysis. Specify if these criteria were established a priori. If no criteria were set, state this explicitly. | NA                                                                                                                  | NA                                                                                                                  |
|                                            | b. For each experimental group, report any animals, experimental units or data points not included in the analysis and explain why. If there were no exclusions, state so.                                                                                 | See regression analysis in the materials and methods                                                                | See regression analysis in the materials and methods                                                                |
|                                            | c. For each analysis, report the exact value of n in each experimental group.                                                                                                                                                                              | See legends in figure 2-figure 5 and supplementary table 8 in additional file 1                                     | See legends in figure 2-figure 5 and supplementary table 8 in additional file 1                                     |
| 4. Randomisation                           | a. State whether randomisation was used to allocate experimental units to control and treatment groups. If done, provide the method used to generate the randomisation sequence.                                                                           | NA                                                                                                                  | NA                                                                                                                  |
|                                            | b. Describe the strategy used to minimise potential confounders such as the order of treatments and measurements, or animal/cage location. If confounders were not controlled, state this explicitly.                                                      | NA                                                                                                                  | NA                                                                                                                  |
| 5. Blinding                                | Describe who was aware of the group allocation at the different stages of the experiment (during the allocation, the conduct of the experiment, the outcome assessment, and the data analysis).                                                            | NA                                                                                                                  | NA                                                                                                                  |
| 6. Outcome measures                        | a. Clearly define all outcome measures assessed (e.g. cell death, molecular markers, or behavioural changes).                                                                                                                                              | See gene expression analysis, phenotypic association analyses,                                                      | See gene expression analysis, phenotypic association analyses,                                                      |
|                                            | b. For hypothesis-testing studies, specify the primary outcome measure, i.e. the outcome measure that was used to determine the sample size.                                                                                                               | NA                                                                                                                  |                                                                                                                     |
| 7. Statistical methods                     | a. Provide details of the statistical methods used for each analysis, including software used.                                                                                                                                                             | See gene expression analysis, regression analysis, cortisol assay analyses in the materials and methods             | See gene expression analysis, regression analysis, cortisol assay analyses in the materials and methods             |
|                                            | b. Describe any methods used to assess whether the data met the assumptions of the statistical approach, and what was done if the assumptions were not met.                                                                                                | See regression analysis in the materials and methods                                                                | See regression analysis in the materials and methods                                                                |
| 8. Experimental animals                    | a. Provide species-appropriate details of the animals used, including species, strain and substrain, sex, age or developmental stage, and, if relevant, weight.                                                                                            | See PRRSV challenge experiments and collection of fetal phenotypes in the materials and methods                     | See PRRSV challenge experiments and collection of fetal phenotypes in the materials and methods                     |
|                                            | b. Provide further relevant information on the provenance of animals, health/immune status, genetic modification status, genotype, and any previous procedures.                                                                                            | See PRRSV challenge experiments and collection of fetal phenotypes in the materials and methods                     | See PRRSV challenge experiments and collection of fetal phenotypes in the materials and methods                     |
| 9. Experimental procedures                 | For each experimental group, including controls, describe the procedures in enough detail to allow others to replicate them, including:                                                                                                                    |                                                                                                                     |                                                                                                                     |
|                                            | a. What was done, how it was done and what was used.                                                                                                                                                                                                       | See all sections in the materials and methods                                                                       | See all sections in the materials and methods                                                                       |
|                                            | b. When and how often.                                                                                                                                                                                                                                     |                                                                                                                     |                                                                                                                     |
|                                            | c. Where (including detail of any acclimatisation periods).                                                                                                                                                                                                |                                                                                                                     |                                                                                                                     |
| d. Why (provide rationale for procedures). |                                                                                                                                                                                                                                                            |                                                                                                                     |                                                                                                                     |
| 10. Results                                | For each experiment conducted, including independent replications, report:                                                                                                                                                                                 |                                                                                                                     |                                                                                                                     |
|                                            | a. Summary/descriptive statistics for each experimental group, with a measure of variability where applicable (e.g. mean and SD, or median and range).                                                                                                     | NA                                                                                                                  |                                                                                                                     |
|                                            | b. If applicable, the effect size with a confidence interval                                                                                                                                                                                               | NA                                                                                                                  |                                                                                                                     |
